# Supplementary material
Source: PubMed Central journal article supplement (PMC4420183)
Supplement: chest_147_5_1316_ds01.pdf [file chest_147_5_1316_ds01.pdf]

## Construct Validity and Minimal Important Difference of 6-Minute Walk Distance in Survivors of Acute Respiratory Failure

*Kitty S. Chan, PhD; Elizabeth R. Pfoh, PhD; Linda Denehy, PhD; Doug Elliott, PhD; Anne E. Holland, PhD; Victor D. Dinglas, MPH; and Dale M. Needham, MD, PhD*

CHEST 2015; 147(5):1316-1326

*Online supplements are not copyedited prior to posting.*

**e-Table 1. Construct Validity: Cross-sectional relationship of 6MWD (in % predicted) with mobility and physical function (Convergent Validity) and mental health measures (Discriminant Validity), across studies and data collection points**

| Time Point | Study  | N       | Convergent Validity<br>Correlation with Measures of Physical<br>Function<br>(Pearson r) |        |                               |                                | Discriminant Validity<br>Correlation with Measures of Mental<br>Health<br>(Pearson r) |                               |                                              |                                           |
|------------|--------|---------|-----------------------------------------------------------------------------------------|--------|-------------------------------|--------------------------------|---------------------------------------------------------------------------------------|-------------------------------|----------------------------------------------|-------------------------------------------|
|            |        |         | 4 Meter<br>Walk                                                                         | FPI    | SF-36<br>PF domain<br>(0-100) | EQ-5D<br>Mobility <sup>†</sup> | SF-36<br>MH<br>domain<br>(0-100)                                                      | EQ-5D<br>Anxiety <sup>†</sup> | HADS<br>Anxiety<br>Symptom<br>s <sup>†</sup> | IES-R<br>PTSD<br>Symptoms<br><sup>†</sup> |
| Discharge  | Denehy | 97-98   |                                                                                         |        | 0.32**                        |                                | 0.19                                                                                  |                               |                                              |                                           |
| 3 month    | Denehy | 94-95   |                                                                                         |        | 0.54**                        |                                | 0.34**                                                                                |                               |                                              |                                           |
| 3 month    | ICAP   | 112-114 |                                                                                         |        | 0.74**                        | -0.61**                        | 0.18                                                                                  | -0.20*                        | -0.16                                        | -0.05                                     |
| 6 month    | Denehy | 84-85   |                                                                                         |        | 0.64**                        |                                | 0.50**                                                                                |                               |                                              |                                           |
| 6 month    | ALTOS  | 153-155 | 0.52**                                                                                  | 0.47** | 0.51**                        | -0.44**                        | 0.24**                                                                                | -0.14                         | -0.15                                        | -0.23**                                   |
| 6 month    | ICAP   | 119     |                                                                                         |        | 0.59**                        | -0.56**                        | 0.21*                                                                                 | -0.16                         | -0.11                                        | -0.08                                     |
| 12 month   | Denehy | 73-75   |                                                                                         |        | 0.46**                        |                                | 0.35**                                                                                |                               |                                              |                                           |
| 12 month   | ALTOS  | 143-149 | 0.63**                                                                                  | 0.54** | 0.64**                        | -0.51**                        | 0.20*                                                                                 | -0.11                         | -0.19*                                       | -0.28**                                   |
| 12 month   | ICAP   | 114     |                                                                                         |        | 0.65**                        | -0.58**                        | 0.28**                                                                                | -0.22*                        | -0.11                                        | -0.20*                                    |

Abbreviations: 6MWD: six minute walk distance; FPI: Functional Performance Inventory; SF-36 PF: Medical Outcomes Short-Form 36 Physical Functioning domain; EQ-5D: Euro-QOL; SF-36 MH: Medical Outcomes Short-Form 36 Mental Health domain; HADS: Hospital Anxiety and Depression survey; IES-R PTSD: Impact of Event Scale-Revised Post-Traumatic Stress Disorder; \* p<0.05; \*\* p<0.01; <sup>†</sup> For these scales, higher score indicate worse functioning and poorer mental health, resulting in negative correlation with the 6MWD for which greater distance walked indicate better functional capacity. Score ranges for patient-reported outcomes: SF-36 PF and MH (0-100); EQ-5D mobility and anxiety subscales (0-2); FPI total (0-3); HADS anxiety subscale (0-21); and IES-R (0-4).

*Online supplements are not copyedited prior to posting.*

**e-Table 2. Known Group Differences, t-tests of group differences in 6MWD (% predicted) by measures of muscle weakness and pulmonary function\***

| Time Point                              | Study        | MMT < 48<br>n=5-26 | MMT ≥ 48<br>n=93-248 | p-value | FEV < 70%<br>n=31-85 | FEV ≥ 70%<br>n=29-161 | p-value |
|-----------------------------------------|--------------|--------------------|----------------------|---------|----------------------|-----------------------|---------|
| <b><i>Pooled Analysis</i></b>           |              |                    |                      |         |                      |                       |         |
| 6 month                                 | ALTOS & ICAP | 0.31               | 0.63                 | <0.001  | 0.50                 | 0.67                  | <0.001  |
| 12 month                                | ALTOS & ICAP | 0.28               | 0.66                 | <0.001  | 0.52                 | 0.71                  | <0.001  |
| <b><i>Individual Study Analysis</i></b> |              |                    |                      |         |                      |                       |         |
| 3 month                                 | ICAP         | 0.32               | 0.51                 | 0.01    | 0.43                 | 0.57                  | 0.01    |
| 6 month                                 | ALTOS        | 0.35               | 0.66                 | <0.001  | 0.57                 | 0.69                  | 0.004   |
| 6 month                                 | ICAP         | 0.28               | 0.59                 | <0.001  | 0.40                 | 0.61                  | <0.001  |
| 12 month                                | ALTOS        | 0.31               | 0.67                 | 0.002   | 0.56                 | 0.74                  | <0.001  |
| 12 month                                | ICAP         | 0.27               | 0.64                 | <0.001  | 0.48                 | 0.68                  | <0.001  |

List of abbreviations: 6MWD: six minute walk distance; MMT: manual muscle testing; FEV: forced expiratory volume in 1 second

\* N's for cells: ICAP at 3 Months: MMT<48 = 19; MMT>48 = 93; FEV<70% = 49; FEV>70%=51. ALTOS at 6 months: MMT<48 = 12; MMT>48 = 144; FEV<70% = 48; FEV>70%=99. ICAP at 6 months: MMT<48 = 14; MMT>48 = 104; FEV<70% = 31; FEV>70%=29. ALTOS at 12 months: MMT<48 = 5; MMT>48 = 139; FEV<70 = 46; FEV>70%=93. ICAP at 12 months: MMT<48 = 13; MMT>48 = 100; FEV<70% = 39; FEV>70%=68. Pooled at 6 months: MMT<48 = 26; MMT>48 = 248; FEV<70% =79 ; FEV>70%=128. Pooled at 12 months: MMT<48 = 18; MMT>48 = 239; FEV<70% =85 ; FEV>70%=161.

*Online supplements are not copyedited prior to posting.*

**e-Table 3. Predictive Validity of 6MWD (% predicted) for Post Discharge Outcomes: All-cause Mortality, Any Hospitalization, Alive at Home, and Return to Normal Activity, and Health Related Quality of Life**

| 6MWD                             | Mortality <sup>a</sup>      |                        | Hospitalization <sup>a</sup>    |                        | Alive at home <sup>a</sup>  |                        | Return to Normal Activity <sup>a</sup> |                        | SF-36 Physical Function            | EQ5D Utility                       |
|----------------------------------|-----------------------------|------------------------|---------------------------------|------------------------|-----------------------------|------------------------|----------------------------------------|------------------------|------------------------------------|------------------------------------|
|                                  | by 12m                      | Unadj. OR (95% CI)     | between 6 and 12 m              | Unadj. OR (95% CI)     | at 12 m                     | Unadj. OR (95% CI)     | at 12 m                                | Unadj. OR (95% CI)     | at 12 m Beta (95% CI)              | at 12 m Beta (95% CI)              |
| <b>Pooled Analysis</b>           |                             |                        |                                 |                        |                             |                        |                                        |                        |                                    |                                    |
| 3 month ICAP & Denehy            | Total n = 210<br>Died, n=23 | 0.87**<br>(0.80, 0.94) | Total n =183<br>Any hosp., n=39 | 0.89**<br>(0.83, 0.95) | NA                          | NA                     | Total n =93<br>Normal, n=50            | 1.11*<br>(1.02, 1.20)  | 2.9**<br>(2.2, 3.6)<br>Total n=159 | NA                                 |
| 6 month ICAP & ALTOS             | Total n = 273<br>Died, n=14 | 0.85**<br>(0.77, 0.94) | Total n =237<br>Any hosp., n=60 | 0.87**<br>(0.82, 0.94) | Total n =276<br>Home, n=244 | 1.17**<br>(1.08, 1.26) | Total n =160<br>Normal, n=96           | 1.11**<br>(1.03, 1.19) | 3.6**<br>(2.9, 4.3)<br>Total n=249 | 1.6**<br>(1.0, 2.2)<br>Total n=250 |
| 6 months ICAP, ALTOS & Denehy    | Total n = 338<br>Died, n=20 | 0.84**<br>(0.77, 0.92) | Total n =322<br>Any hosp., n=74 | 0.89**<br>(0.84, 0.94) | NA                          | NA                     | Total n =188<br>Normal, n=113          | 1.10**<br>(1.02, 1.17) | 3.4**<br>(2.8, 3.9)<br>Total n=317 | NA                                 |
| <b>Individual Study Analysis</b> |                             |                        |                                 |                        |                             |                        |                                        |                        |                                    |                                    |
| Discharge Denehy                 | Total n = 111<br>Died, n=12 | 1.07<br>(0.93, 1.23)   | Total n =111<br>Any hosp., n=42 | 0.96<br>(0.88, 1.06)   | NA                          | NA                     | Total n =27<br>Normal, n=16            | 0.95<br>(0.75, 1.21)   | 1.6*<br>(0.2, 3.0)<br>Total n = 75 | NA                                 |
| 3 month ICAP                     | Total n = 114<br>Died,      | 0.83**<br>(0.74, 0.93) | Total n = 87<br>Any hosp.,      | 0.92<br>(0.83, 1.10)   | Total n =111<br>Home,       | 1.26**<br>(1.13, 1.39) | Total n =65<br>Normal,                 | 1.12*<br>(1.02, 1.24)  | 3.1**<br>(2.1, 4.1)                | 1.4**<br>(0.6, 2.3)                |

*Online supplements are not copyedited prior to posting.*



|                | n=15                       |                        | n=22                             |                        | n=88                         |                        | n=33                         |                       | Total n=88                         | Total n=89                         |
|----------------|----------------------------|------------------------|----------------------------------|------------------------|------------------------------|------------------------|------------------------------|-----------------------|------------------------------------|------------------------------------|
| 3 month Denehy | Total n = 96<br>Died, n=8  | 0.92<br>(0.80, 1.07)   | Total n = 96<br>Any hosp., n=17  | 0.86**<br>(0.77, 0.96) | NA                           | NA                     | Total n = 28<br>Normal, n=17 | 1.05<br>(0.87, 1.27)  | 2.6**<br>(1.4, 3.7)<br>Total n=71  | NA                                 |
| 6 month ICAP   | Total n = 119<br>Died, n=8 | 0.82**<br>(0.71, 0.94) | Total n = 93<br>Any hosp., n=27  | 0.87**<br>(0.78, 0.97) | Total n = 118<br>Home, n=102 | 1.28**<br>(1.14, 1.44) | Total n = 66<br>Normal, n=38 | 1.07<br>(0.97, 1.19)  | 3.5**<br>(2.5, 4.5)<br>Total n=105 | 1.7**<br>(0.9, 2.6)<br>Total n=105 |
| 6 month Denehy | Total n = 85<br>Died, n=6  | 0.81*<br>(0.69, 0.95)  | Total n = 85<br>Any hosp., n=14  | 0.94<br>(0.85, 1.04)   | NA                           | NA                     | Total n = 28<br>Normal, n=17 | 1.05<br>(0.87, 1.27)  | 2.6**<br>(1.6, 3.7)<br>Total n=68  | NA                                 |
| 6 month ALTOS  | Total n = 158<br>Died, n=6 | 0.90<br>(0.76, 1.06)   | Total n = 144<br>Any hosp., n=33 | 0.89**<br>(0.82, 0.97) | Total n = 158<br>Home, n=142 | 1.06<br>(0.95, 1.19)   | Total n = 94<br>Normal, n=58 | 1.15*<br>(1.03, 1.29) | 3.8**<br>(2.8, 4.8)<br>Total n=144 | 1.6**<br>(0.8, 2.5)<br>Total n=145 |

$p \leq 0.05$ , \*\* $p \leq 0.01$ ; Abbreviations: 6MWD: six minute walk distance; OR: odds ratio; Each analysis based on participants with an observation for both outcome and 6MWD at specified time point; Odds ratio for every 5% increase in % predicted value;<sup>a</sup> Outcomes coding: Died=1, Alive=0; Any hospitalization during period=1, No hospitalization=0; Alive at home=1, not at home/died =0; Return to normal activity=1, did not return to normal activity=0; SF-36 PF (score range 0-100), EQ-5D Utility (0-100).<sup>b</sup> Elliott data only has outcomes measured up to 6 month post discharge; All other studies have outcome data up to 12 month post discharge.

*Online supplements are not copyedited prior to posting.*

**e-Table 4. Responsiveness to Change in Recovery Trajectory: Mean change in 6MWD (% predicted) relative to patient reported change of >10 points on Normalized SF-36 Physical Functioning Score**

| Change Period                           | Study       | Negative change >10 points SF-36 Physical Functioning Normalized Score (N = 1-17) | No Change (N = 21-226) | Positive change >10 points SF-36 Physical Functioning Normalized Score (N = 11-120) |
|-----------------------------------------|-------------|-----------------------------------------------------------------------------------|------------------------|-------------------------------------------------------------------------------------|
| <b><u>Pooled Analysis</u></b>           |             |                                                                                   |                        |                                                                                     |
| <b>3 to 6 month</b>                     | ICAP/Denehy | -0.19** <sup>a</sup>                                                              | 0.05 <sup>a</sup>      | 0.12* <sup>a</sup>                                                                  |
| <b>6 to 12 month</b>                    | ICAP/ALTOS  | -0.10** <sup>a</sup>                                                              | 0.04                   | 0.07 <sup>a</sup>                                                                   |
| <b><u>Individual Study Analysis</u></b> |             |                                                                                   |                        |                                                                                     |
| <b>Discharge to 3 month</b>             | Denehy      | 0.22* <sup>a</sup>                                                                | 0.41                   | 0.41 <sup>a</sup>                                                                   |
| <b>3 to 6 month</b>                     | Denehy      | -0.24** <sup>a</sup>                                                              | 0.06                   | 0.13** <sup>a</sup>                                                                 |
| <b>3 to 6 month</b>                     | ICAP        | 0.04                                                                              | 0.05                   | 0.12                                                                                |
| <b>6 to 12 month</b>                    | ICAP        | -0.13** <sup>a</sup>                                                              | 0.02                   | 0.06* <sup>a</sup>                                                                  |
| <b>6 to 12 month</b>                    | ALTOS       | -0.001                                                                            | 0.04                   | 0.08                                                                                |

List of abbreviations: 6MWD: six minute walk distance; SF-36: Medical Outcomes Short-Form 36

\*  $p \leq 0.05$  and \*\*  $p \leq 0.01$  for comparison between each of the change groups with the no change group; <sup>a</sup>  $p \leq 0.05$  for comparison between the positive change group with the negative change group.

Additional Notes: ALTOS and ICAP scores normed to US general population; Denehy scores normed to Australian general population; Sample size by study and time point. Denehy discharge to 3m: positive change (29); no change (54); negative change (11). Denehy 3m to 6m: positive change (10); no change (61); negative change (8). ICAP 3m to 6m: positive change (15); no change (65); negative change (2). ICAP 6m to 12m: positive change (14); no change (71); negative change (8). ALTOS 6m to 12m: positive change (16); no change (106); negative change (2). Pooled 3m to 6m: positive change (25); no change(126); negative change(10). Pooled 6m to 12m: positive change (30); no change(177); negative change(10).

*Online supplements are not copyedited prior to posting.*

**e-Table 5. Minimal Clinically Important Difference for 6MWD (% predicted)**

|                                                          | <b>ALTOS</b> | <b>ICAP</b> | <b>Denehy</b> |
|----------------------------------------------------------|--------------|-------------|---------------|
| <b><i>Anchor-Based</i></b>                               |              |             |               |
| <b>SF-36 PF domain*</b>                                  |              |             |               |
| 3 Month                                                  | --           | 0.03        | 0.03          |
| 6 Month                                                  | 0.02         | 0.02        | 0.03          |
| 12 Month                                                 | 0.03         | 0.03        | 0.03          |
| <b>EQ5-D Utility score**</b>                             |              |             |               |
| 3 Month                                                  | --           | 0.05        | --            |
| 6 Month                                                  | 0.04         | 0.04        | --            |
| 12 Month                                                 | 0.03         | 0.04        | --            |
| <b><i>Distribution Based</i></b>                         |              |             |               |
| <b>Standard Error of Measurement</b>                     |              |             |               |
| 3 month                                                  | --           | 0.06        | 0.05          |
| 6 month                                                  | 0.05         | 0.06        | 0.06          |
| <b>Minimal Detectable Change<sub>90</sub></b>            |              |             |               |
| 3 month                                                  | --           | 0.14        | 0.13          |
| 6 month                                                  | 0.12         | 0.13        | 0.14          |
| <b>0.5 SD (equivalent to moderate Cohen effect size)</b> |              |             |               |
| ICU discharge                                            | --           | --          | 0.09          |
| Hospital discharge                                       | --           | --          | 0.11          |
| 3 month                                                  | --           | 0.14        | 0.12          |
| 6 month                                                  | 0.11         | 0.12        | 0.14          |
| 12 month                                                 | 0.13         | 0.12        | 0.13          |
| <b>0.2 SD (equivalent to small Cohen effect size)</b>    |              |             |               |
| ICU discharge                                            | --           | --          | 0.03          |
| Hospital discharge                                       | --           | --          | 0.04          |
| 3 month                                                  | --           | 0.06        | 0.05          |
| 6 month                                                  | 0.04         | 0.05        | 0.05          |
| 12 month                                                 | 0.05         | 0.05        | 0.05          |

*Online supplements are not copyedited prior to posting.*

# CHEST™ Online Supplement

Abbreviations: 6MWD: six minute walk distance; SF-36 PF: Medical Outcomes Short-Form 36 physical functioning domain; EQ-5D: Euro-QOL; SD: standard deviation; \* MID calculated by multiplying linear regression beta estimate with SF-36 MID of 5 points,<sup>1</sup> using the SF-36 0-100 non-normalized scale; \*\* MID calculated by multiplying linear regression beta estimate with MID of 7.4 for the EQ-5D Utility score.<sup>2</sup> EQ-5D Utility score and MID multiplied by 100 to facilitate comparison with SF-36 estimates; Cross-sectional correlation for 6MWD with the SF-36 PF score (0.36 - 0.76,  $p < 0.01$ ) and with the EQ-5D utility score (0.43 - 0.65,  $p < 0.01$ ).

## REFERENCES

1. Hays RD, Morales LS. The RAND SF-36 measure of health-related quality of life. *Ann Med* 2001;33:350-357.
2. Walters SJ, Brazier J. Comparison of the minimally important difference for two health state utility measures: EQ-5D and SF-6D. *Qual Life Res* 2005;14:1523–1532.

*Online supplements are not copyedited prior to posting.*
